# Supplementary material
Source: PubMed Central journal article supplement (PMC4959485)
Supplement: AEM.03535-15_zam999117054so1.pdf [file AEM.03535-15_zam999117054so1.pdf]

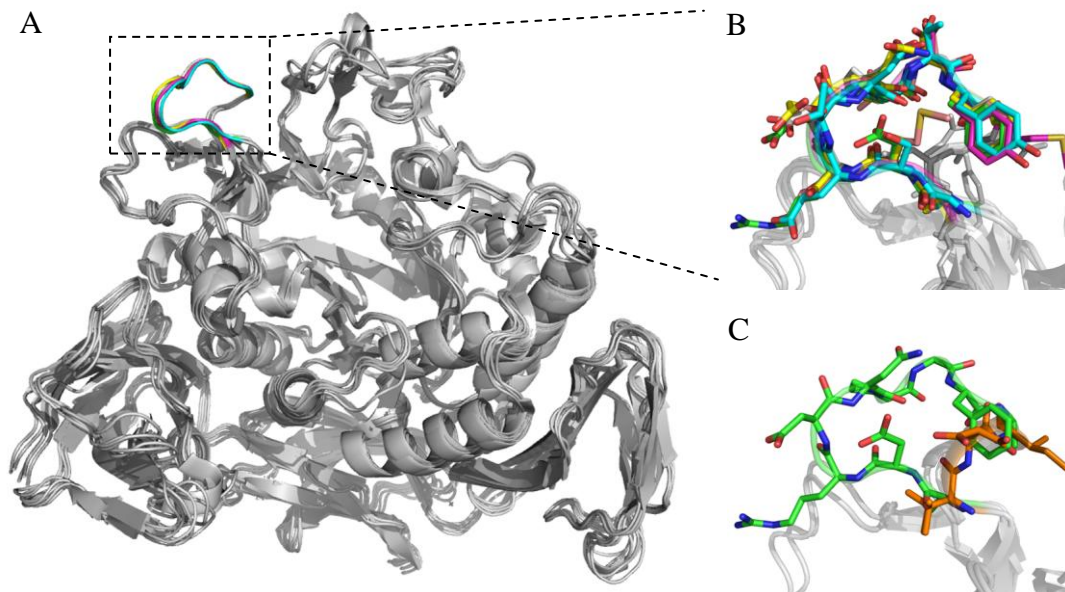

**FIG S1** **A**, Structure alignment of parsed  $\alpha$ -CGTases,  $\alpha/\beta$ -CGTases and  $\beta$ -CGTase, the CCGTases are rendered in cartoon format and the loops constitute the subsite -7 are colorized: *Paenibacillus macerans* CGTase (PDB ID 4JCL), in green, *T. thermosulfurigenes* Em1 CGTase (PDB ID 1A47), in cyan, *B. stearothermophilus* N02 CGTase (PDB ID 1CYG), in magenta, *Bacillus circulans* 251 CGTase (PDB ID 1CDG), in yellow, *Bacillus circulans* 8 CGTase (PDB ID 1CGT), in salmon, *Bacillus sp.* 1011 CGTase (PDB ID 1PAM), in gray. The rest are coloured in gray. **B**, Partial view of the structures with the amino acid residues rendered in stick and coloured by element (N, blue; O, red; C, in accord with those in **A**). **C**, Comparison of *Bacillus clarkii*  $\gamma$ -CGTase (C, orange; N, blue; O, red; PDB ID 4JCM) with *Paenibacillus macerans*  $\alpha$ -CGTase.

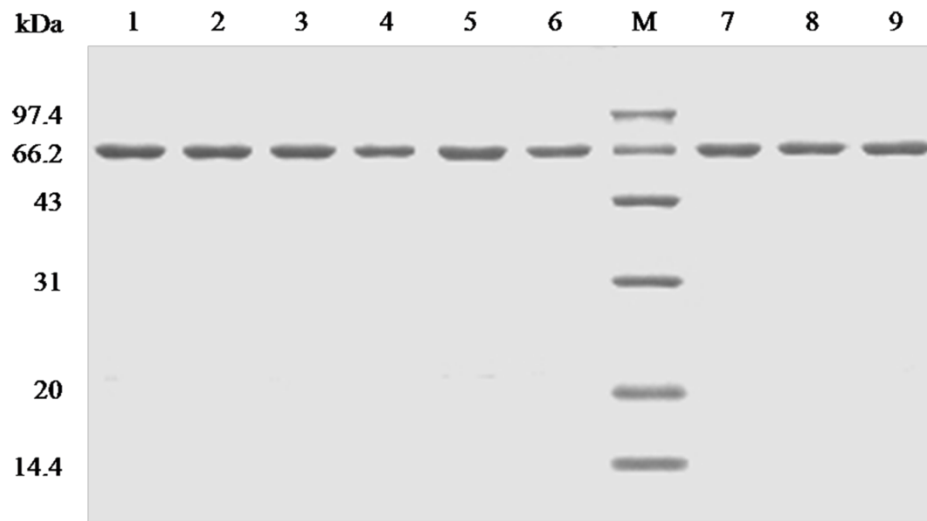

**FIG S2** SDS-PAGE analysis of the purified wild-type and mutant proteins, Lanes: 1, wild-type CGTase; 2, mutant D145A; 3, mutant R146A; 4, mutant D147A; 5, mutant R146P; 6, mutant D147P; M, molecular mass marker; 7, mutant R146A/D147P; 8, mutant R146P/D147A and 7, mutant R146P/D147P.

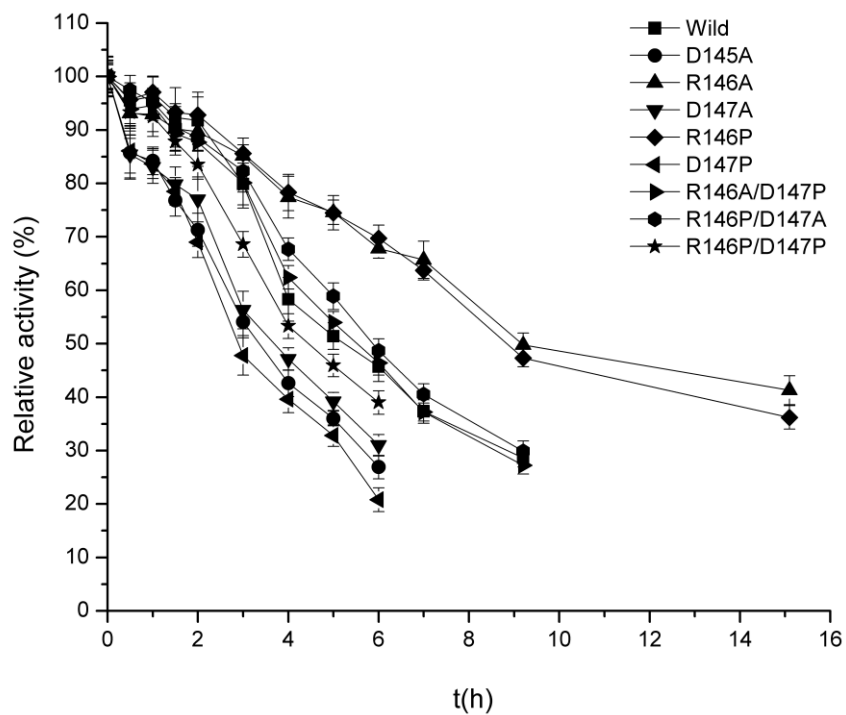

**FIG S3** Stability of wild-type and mutant CGTases. Indicated enzymes were diluted to a concentration of 0.3 mg/ml with buffer at pH 5.5 and incubated at 45 °C for the indicated periods of time, then assayed for residual  $\alpha$ -CGTase activity. Samples assayed prior to incubation at 45 °C were used as standards. Their activity was defined as 100%, and all subsequent activity measurements were scaled to these standards.

**TABLE S1** Summary of isolation and purification procedures of CGTase

| Enzyme      | Purification step                                   | Total activity <sup>a</sup> (U) | Total protein (mg) | Specific activity (U/mg) | Purification (fold) | Yield (%) |
|-------------|-----------------------------------------------------|---------------------------------|--------------------|--------------------------|---------------------|-----------|
| Wild-type   | Crude enzyme                                        | 6951                            | 343.80             | 20.22                    | 1.00                | 100.0     |
|             | 25% (NH <sub>4</sub> ) <sub>2</sub> SO <sub>4</sub> | 5440                            | 90.51              | 60.10                    | 2.97                | 78.2      |
|             | DEAE-Sepharose                                      | 2320                            | 19.40              | 119.60                   | 5.91                | 33.4      |
| D145A       | Crude enzyme                                        | 6468                            | 331.50             | 19.51                    | 1.00                | 100.0     |
|             | 25% (NH <sub>4</sub> ) <sub>2</sub> SO <sub>4</sub> | 5392                            | 97.32              | 55.40                    | 2.84                | 83.4      |
|             | DEAE-Sepharose                                      | 2286                            | 21.93              | 104.26                   | 5.34                | 35.4      |
| R146A       | Crude enzyme                                        | 7970                            | 352.20             | 22.63                    | 1.00                | 100.0     |
|             | 25% (NH <sub>4</sub> ) <sub>2</sub> SO <sub>4</sub> | 6136                            | 94.63              | 64.84                    | 2.87                | 77.0      |
|             | DEAE-Sepharose                                      | 2518                            | 19.09              | 131.90                   | 5.83                | 31.6      |
| D147A       | Crude enzyme                                        | 6520                            | 337.50             | 19.32                    | 1.00                | 100.0     |
|             | 25% (NH <sub>4</sub> ) <sub>2</sub> SO <sub>4</sub> | 5591                            | 98.67              | 56.67                    | 2.93                | 85.7      |
|             | DEAE-Sepharose                                      | 2242                            | 19.95              | 112.38                   | 5.82                | 34.4      |
| R146P       | Crude enzyme                                        | 7622                            | 358.70             | 21.25                    | 1.00                | 100.0     |
|             | 25% (NH <sub>4</sub> ) <sub>2</sub> SO <sub>4</sub> | 5906                            | 94.30              | 62.63                    | 2.95                | 77.5      |
|             | DEAE-Sepharose                                      | 2406                            | 18.47              | 130.30                   | 6.13                | 31.6      |
| D147P       | Crude enzyme                                        | 7318                            | 338.80             | 21.60                    | 1.00                | 100.0     |
|             | 25% (NH <sub>4</sub> ) <sub>2</sub> SO <sub>4</sub> | 6006                            | 92.78              | 64.74                    | 3.00                | 82.1      |
|             | DEAE-Sepharose                                      | 2356                            | 22.20              | 107.10                   | 4.96                | 32.2      |
| R146A/D147P | Crude enzyme                                        | 7158                            | 350.40             | 20.43                    | 1.00                | 100.0     |
|             | 25% (NH <sub>4</sub> ) <sub>2</sub> SO <sub>4</sub> | 5895                            | 92.78              | 63.54                    | 3.11                | 82.4      |
|             | DEAE-Sepharose                                      | 2375                            | 20.80              | 114.20                   | 5.59                | 33.2      |
| R146P/D147A | Crude enzyme                                        | 7814                            | 336.50             | 23.22                    | 1.00                | 100.0     |
|             | 25% (NH <sub>4</sub> ) <sub>2</sub> SO <sub>4</sub> | 6329                            | 88.50              | 71.51                    | 3.08                | 81.0      |
|             | DEAE-Sepharose                                      | 2719                            | 21.72              | 125.20                   | 5.39                | 34.8      |
| R146P/D147P | Crude enzyme                                        | 6603                            | 325.30             | 20.30                    | 1.00                | 100.0     |
|             | 25% (NH <sub>4</sub> ) <sub>2</sub> SO <sub>4</sub> | 5586                            | 93.61              | 59.67                    | 2.94                | 84.6      |
|             | DEAE-Sepharose                                      | 2238                            | 19.77              | 113.20                   | 5.58                | 33.9      |

<sup>a</sup> the activity was  $\alpha$ -cyclodextrin forming activity
